# Supplementary material for: Burnout, Anxiety, and Resilience Among Nurses During Wartime: Evidence from a Cross-Sectional Study
Source: Research Square preprint supplement (doi:10.21203/rs.3.rs-7106310/v1), 2025-07-24
Supplement: Supplementary file 1 [file 2b534ceaf3340c59782fe3d3.docx]

Table 1. Differences in anxiety and stress levels between sociodemographic variables of respondents

|  | **N (%)** | **Anxiety** | | | | | **Stress** | | | | |
| --- | --- | --- | --- | --- | --- | --- | --- | --- | --- | --- | --- |
|  | **Normal/ Mild**  **N (%)** | **Moderate**  **N (%)** | **Severe**  **N (%)** | **Extremely severe**  **N (%)** | ***p* value** | **Normal/ Mild**  **N (%)** | **Moderate**  **N (%)** | **Severe**  **N (%)** | **Extremely severe**  **N (%)** | ***p* value** |
| **Gender** |  |  |  |  |  |  |  |  |  |  |  |
| Male | 160 (35.6) | 8 (42.1) | 8 (25.8) | 18 (48.6) | 126 (34.8) | 0.213 | 14 (33.3) | 28 (42.4) | 69 (38.1) | 49 (30.6) | 0.300 |
| Female | 289 (64.4) | 11 (57.9) | 23 (74.2) | 19 (51.4) | 236 (65.2) | 28 (66.7) | 38 (57.6) | 112 (61.9) | 111 (69.4) |
| **Age** |  |  |  |  |  |  |  |  |  |  |  |
| 18-30 | 131 (28.3) | 2 (10.0) | 9 (21.8) | 12 (31.6) | 108 (29.0) | 0.319 | 12 (28.6) | 20 (29.4) | 53 (28.2) | 46 (27.9) | 0.627 |
| 31-40 | 146 (31.5) | 8 (40.0) | 12 (37.5) | 8 (21.1) | 118 (31.6) | 13 (31.0) | 20 (29.4) | 60 (31.9) | 53 (32.1) |
| 41-50 | 115 (24.8) | 5 (25.0) | 6 (18.8) | 8 (21.1) | 96 (25.7) | 10 (23.8) | 12 (17.6) | 46 (24.5) | 47 (28.5) |
| 51+ | 71 (15.3) | 5 (25.0) | 5 (15.6) | 10 (26.3) | 51 (13.7) | 7 (16.7) | 16 (23.5) | 29 (15.4) | 19 (11.5) |
| **Family status** |  |  |  |  |  |  |  |  |  |  |  |
| Not in a relationship | 115 (24.9) | 2(10.0) | 9 (28.1) | 8 (21.1) | 96 (25.8) | 0.389 | 10 (23.8) | 13 (19.1) | 44 (23.5) | 48 (29.1) | 0.395 |
| In a relationship | 347 (75.1) | 18 (90.0) | 23 (71.9) | 30 (78.9) | 276 (75.1) | 32 (76.2) | 55 (80.9) | 143 (76.5) | 117 (70.9) |
| **Country of birth** |  |  |  |  |  |  |  |  |  |  |  |
| Israel | 287 (82.0) | 14 (73.7) | 21 (87.5) | 23 (88.5) | 229 (81.5) | 0.539 | 29 (82.9) | 43 (86.0) | 112 (78.3) | 103 (84.4) | 0.502 |
| Abroad | 63 (18.0) | 5 (26.3) | 3 (12.5) | 3 (11.5) | 52 (18.5) | 6 (17.1) | 7 (14.0) | 31 (21.7) | 19 (15.6) |
| **Number of workplaces** |  |  |  |  |  |  |  |  |  |  |  |
| 1 | 397 (86.5) | 18 (90.0) | 28 (87.5) | 35 (92.1) | 316 (85.6) | 0.684 | 36 (85.7) | 54 (80.6) | 160 (85.6) | 147 (90.2) | 0.256 |
| 2+ | 62 (13.5) | 2 (10.0) | 4 (12.5) | 3 (7.9) | 53 (14.4) | 6 (14.3) | 13 (19.4) | 27 (14.4) | 16 (9.8) |
| **Number of children** |  |  |  |  |  |  |  |  |  |  |  |
| 0-1 | 96 (23.1) | 3 (15.0) | 5 (17.2) | 9 (27.3) | 79 (23.7) | 0.237 | 10 (24.4) | 19 (29.7) | 30 (18.1) | 37 (25.5) | 0.303 |
| 2-3 | 197 (47.4) | 14 (70.0) | 18 (62.1) | 13 (39.4) | 152 (45.5) | 21 (51.2) | 23 (35.9) | 87 (52.4) | 66 (45.5) |
| 4+ | 123 (29.6) | 3 (15.0) | 6 (20.7) | 11 (33.3) | 103 (30.8) | 10 (24.4) | 22 (34.4) | 49 (29.5) | 42 (29.0) |
| **Main work hospital location** |  |  |  |  |  |  |  |  |  |  |  |
| North | 165 (35.6) | 7 (35.0) | 11 (34.4) | 10 (26.3) | 137 (36.6) | 0.699 | 18 (42.9) | 26 (37.7) | 53 (28.2) | 68 (41.2) | 0.021 |
| Center | 205 (44.2) | 7 (35.0) | 16 (50.0) | 18 (47.4) | 164 (43.9) | 15 (35.7) | 37 (53.6) | 90 (47.9) | 63 (38.2) |
| South | 94 (20.3) | 6 (30.0) | 5 (15.6) | 10 (26.3) | 73 (19.5) | 9 (21.4) | 6 (8.7) | 45 (23.9) | 34 (20.6) |
| **Years of professional experience** |  |  |  |  |  |  |  |  |  |  |  |
| <10 years | 181 (39.8) | 2 (10.0) | 12 (38.7) | 15 (40.5) | 152 (41.4) | 0.080 | 15 (35.7) | 29 (43.3) | 68 (37.2) | 69 (42.3) | 0.424 |
| 10-20 years | 168 (36.9) | 12 (60.0) | 15 (48.4) | 12 (32.4) | 129 (35.1) | 15 (35.7) | 18 (26.9) | 73 (39.9) | 62 (38.0) |
| >20 years | 106 (23.3) | 6 (30.0) | 4 (12.9) | 10 (27.0) | 86 (23.4) | 12 (28.6) | 20 (29.9) | 42 (23.0) | 32 (19.6) |
| **Working night shifts** |  |  |  |  |  |  |  |  |  |  |  |
| Yes | 401 (91.1) | 7 (35.0) | 25 (80.6) | 34 (91.9) | 335 (95.2) | <0.001 | 29 (72.5) | 63 (91.3) | 170 (93.9) | 139 (92.7) | <0.001 |
| No | 39 (8.9) | 13 (65.0) | 6 (19.4) | 3 (8.1) | 17 (4.8) | 11 (27.5) | 6 (8.7) | 11 (6.1) | 11 (7.3) |
| **Number of monthly working hours** |  |  |  |  |  |  |  |  |  |  |  |
| Full time or bellow (<=180) | 171 (38.2) | 17 (85.0) | 17 (56.7) | 13 (36.1) | 124 (34.3) | <0.001 | 24 (58.5) | 19 (28.8) | 61 (33.7) | 67 (41.9) | 0.007 |
| Above full time (>180) | 277 (61.8) | 3 (15.0) | 13 (43.3) | 23 (63.9) | 238 (65.7) | 17 (41.5) | 47 (71.2) | 120 (66.3) | 93 (58.1) |
| **Served in the army during the war** |  |  |  |  |  |  |  |  |  |  |  |
| Yes | 82 (17.9) | 2 (10.0) | 7 (22.6) | 7 (18.4) | 66 (17.8) | 0.724 | 8 (19.0) | 16 (23.9) | 24 (13.0) | 34 (20.6) | 0.135 |
| No | 377 (82.1) | 18 (90.0) | 24 (77.4) | 31 (81.6) | 304 (82.2) | 34 (81.0) | 51 (76.1) | 161 (87.0) | 131 (79.4) |
| **Had family members who served in the army during the war** |  |  |  |  |  |  |  |  |  |  |  |
| Yes | 233 (50.9) | 3 (15.0) | 10 (32.3) | 16 (43.2) | 204 (55.1) | <0.001 | 12 (29.3) | 45 (66.2) | 101 (54.0) | 75 (46.3) | 0.001 |
| No | 225 (49.1) | 17 (85.0) | 21 (67.7) | 21 (56.8) | 166 (44.9) | 29 (70.7) | 23 (33.8) | 86 (46.0) | 87 (53.7) |
