# Supplementary material for: Burnout, Anxiety, and Resilience Among Nurses During Wartime: Evidence from a Cross-Sectional Study
Source: Research Square preprint supplement (doi:10.21203/rs.3.rs-7106310/v1), 2025-07-24
Supplement: Supplementary file 2 [file c56890f6e6a4140a6f222953.docx]

**Survey**

CD-RISC-10 survey

Please read each statement and choose the number that indicates how much the statement applied to you. There are no right or wrong answers.

|  | 0-Not true at all | 1 | 2 | 3 | 4-True nearly all the time |
| --- | --- | --- | --- | --- | --- |
| 1. I am able to adapt when changes occur |  |  |  |  |  |
| 1. I can deal with whatever comes my way |  |  |  |  |  |
| 1. I try to see the humorous side of things when I am faced with problems |  |  |  |  |  |
| 1. Having to cope with stress can make me stronger |  |  |  |  |  |
| 1. I tend to bounce back after illness, injury, or other hardships |  |  |  |  |  |
| 1. I believe I can achieve my goals, even if there are obstacles |  |  |  |  |  |
| 1. Under pressure, I stay focused and think clearly |  |  |  |  |  |
| 1. I am not easily discouraged by failure |  |  |  |  |  |
| 1. I think of myself as a strong person when dealing with life’s challenges and difficulties |  |  |  |  |  |
| 1. I am able to handle unpleasant or painful feelings like sadness, fear, and anger |  |  |  |  |  |

DASS-21 survey

Please read each statement and choose the number that indicates how much the statement applied to you over the past week. There are no right or wrong answers. Do not spend too much time on any statement.

| A – Anxiety, S - Stress | 0-Did not apply to me at all | 1 | 2 | 3-Applied to me very much or most of the time |
| --- | --- | --- | --- | --- |
| 1. I found it hard to wind down (S) |  |  |  |  |
| 1. I was aware of the dryness of my mouth (A) |  |  |  |  |
| 1. I experienced breathing difficulty (eg, excessively rapid breathing, breathlessness in the absence of physical exertion) (A) |  |  |  |  |
| 1. I tended to over-react to situations (S) |  |  |  |  |
| 1. I experienced trembling (eg, in my hands) (A) |  |  |  |  |
| 1. I felt that I was using a lot of nervous energy (S) |  |  |  |  |
| 1. I was worried about situations in which I might panic and make a fool of myself (A) |  |  |  |  |
| 1. I found myself getting agitated (S) |  |  |  |  |
| 1. I found it difficult to relax (S) |  |  |  |  |
| 1. I was intolerant of anything that kept me from getting on with what I was doing (S) |  |  |  |  |
| 1. I felt I was close to panic (A) |  |  |  |  |
| 1. I felt that I was rather touchy (S) |  |  |  |  |
| 1. I was aware of the action of my heart in the absence of physical exertion (eg, sense of heart rate increase, heart missing a beat) (A) |  |  |  |  |
| 1. I felt scared without any good reason (A) |  |  |  |  |

CBI Scale

Please read each statement and choose the number that indicates how much the statement applied to you. There are no right or wrong answers.

|  | 0 - Never/almost never | 1 | 2 | 3 | 4 - Always |
| --- | --- | --- | --- | --- | --- |
| 1. How often are you physically exhausted? |  |  |  |  |  |
| 1. How often are you emotionally exhausted? |  |  |  |  |  |
| 1. How often do you think: "I cannot take it anymore.” |  |  |  |  |  |
| 1. How often do you feel worn out? |  |  |  |  |  |
| 1. How often do you feel weak and susceptible to illness? |  |  |  |  |  |
| 1. Do you feel worn out at the end of the working day? |  |  |  |  |  |
| 1. Are you exhausted in the morning at the thought of another day at work? |  |  |  |  |  |
| 1. Do you feel that every working hour is tiring for you? |  |  |  |  |  |
| 1. Do you have enough energy for family and friends during leisure time? |  |  |  |  |  |
| 1. Is your work emotionally exhausting? |  |  |  |  |  |
| 1. Does your work frustrate you? |  |  |  |  |  |
| 1. Do you find it hard to work with clients? |  |  |  |  |  |
| 1. Does it drain your energy to work with clients? |  |  |  |  |  |
| 1. Do you feel that you give more than you get back when you work with clients? |  |  |  |  |  |

1. Gender: 1. Male 2. Female
2. Age: 18-30, 31-40, 41-50, 51+
3. Family status: In a relationship / Not in a relationship
4. Country of birth: Israel / Abroad
5. Number of workplaces: 1 / 2+
6. Number of children: 0-1 / 2-3 / 4+
7. Main work hospital location: North / Center / South
8. Years of professional experience: <10 years / 1-20 years / >20 years
9. Are you working night shifts: Yes / No
10. Number of monthly working hours: <=180 / >180
11. Served in the army during the war: Yes / No
12. Had family members who served in the army during the war: Yes / No
